# Supplementary material for: Towards ultra-sensitive multimodal luminescent thermometers enabled by high crystal field strength of Lu 2 CaMg 2 Ge 3 O 12 :Yb 3+ ,Nd 3+ ,Er 3+ phosphors
Source: Royal Society of Chemistry journal article supplement (doi:10.1039/d4qi01767f), 2024-01-01
Supplement: d4qi01767f1.pdf [file d4qi01767f1.pdf]

## Supporting Information

### **Towards ultra-sensitive multimodal luminescent thermometers enabled by high crystal field strength of $\text{Lu}_2\text{CaMg}_2\text{Ge}_3\text{O}_{12}:\text{Yb}^{3+}, \text{Nd}^{3+},$ $\text{Er}^{3+}$ phosphors**

*Zhijiao Zhao<sup>1</sup>, Mengmeng Dai<sup>1</sup>, Kejie Li<sup>1</sup>, Guiying Liang<sup>2</sup>, Yanling Wei<sup>2,\*</sup>, Zuoling Fu<sup>1,\*</sup>*

<sup>1</sup>Key Laboratory of Physics and Technology for Advanced Batteries, College of Physics, Jilin University, Changchun 130012, China. E-mail: [zlfu@jlu.edu.cn](mailto:zlfu@jlu.edu.cn) (Z. Fu). Tel: +86-431-85167966. Fax: +86-431-85167966

<sup>2</sup>School of Data Science and Artificial Intelligence, Jilin Engineering Normal University, Changchun 130052, China. E-mail: [weiyanning@jlenu.edu.cn](mailto:weiyanning@jlenu.edu.cn) (Y. Wei)

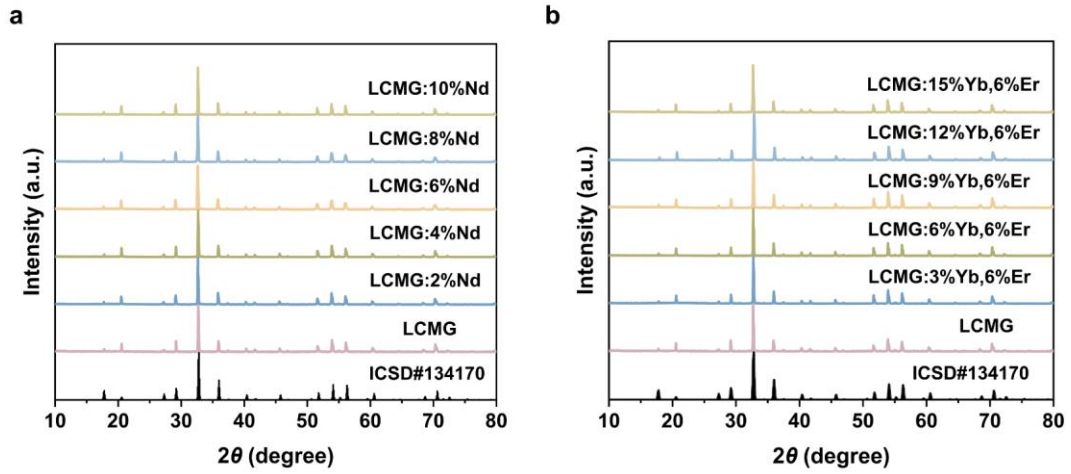

Fig. S1. XRD patterns of (a) LCMG:  $x\%Nd^{3+}$  ( $x=2, 4, 6, 8, 10$ ) and LCMG:  $x\%Yb^{3+}, 6\%Er^{3+}$  ( $x=3, 6, 9, 12, 15$ ).

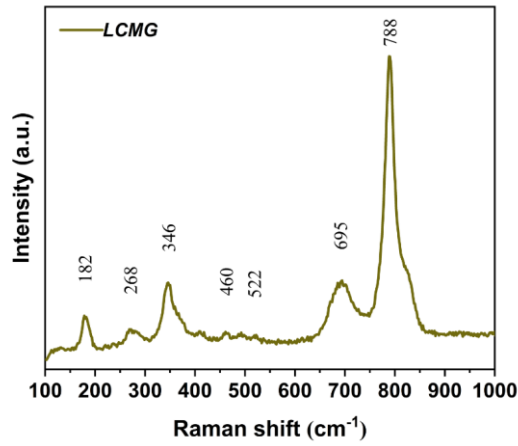

Fig. S2. Raman spectrum of the LCMG host.

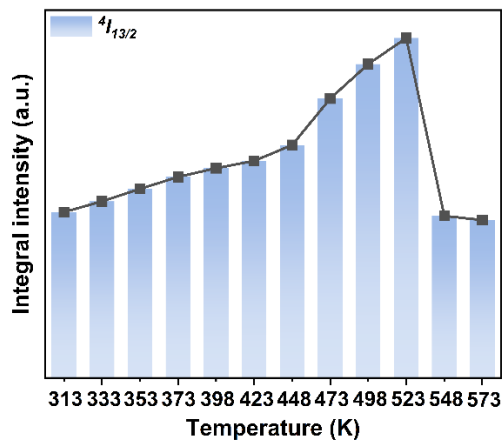

Fig. S3. The integrated intensity of  ${}^4I_{13/2}$  emission in the LCMG:  $12\%Yb^{3+}, 6\%Er^{3+}$ .

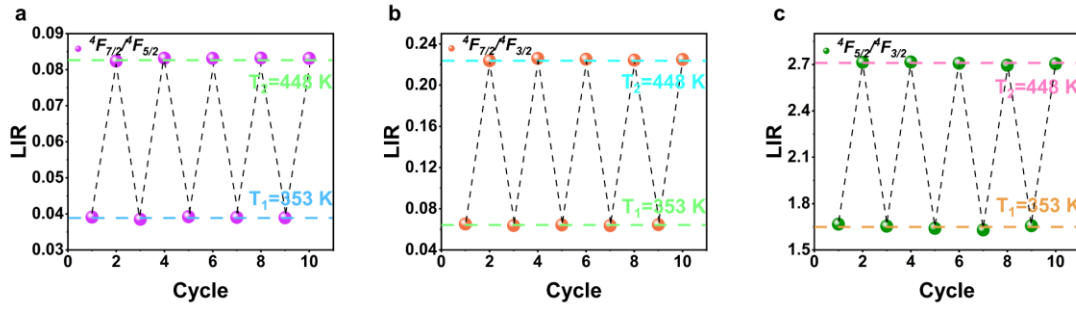

Fig. S4. The repeatability of LIR of LCMG: 6%Yb<sup>3+</sup>, 6%Nd<sup>3+</sup> phosphors.

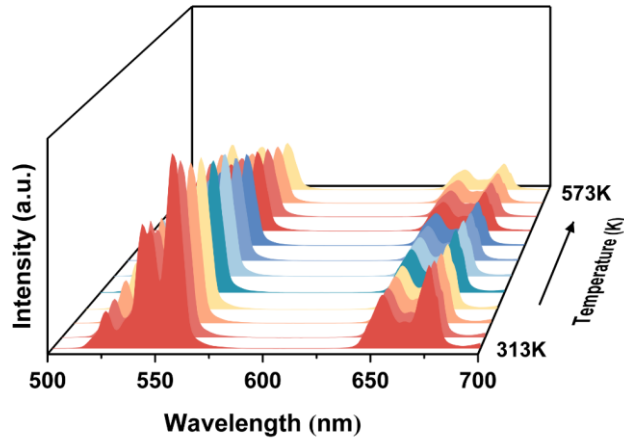

Fig. S5. Temperature-dependent spectra of LCMG: 12%Yb<sup>3+</sup>, 6%Er<sup>3+</sup> phosphors with the temperature range from 313 K to 573 K, excited by 980 nm laser.

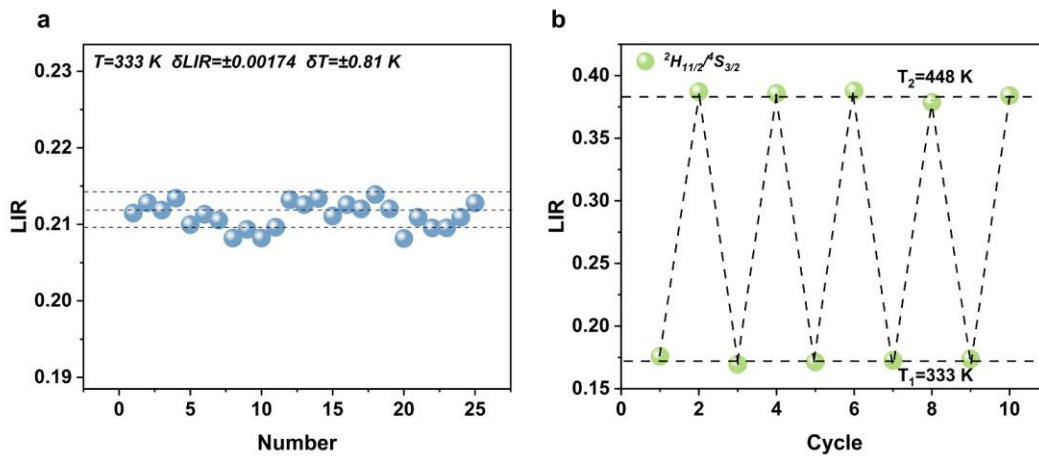

Fig. S6. (a) 25 measurements of LIR of LCMG: 12%Yb<sup>3+</sup>, 6%Er<sup>3+</sup> phosphors at 333 K. (b) The temperature-recycle measurements of LIR values of LCMG: 12%Yb<sup>3+</sup>, 6%Er<sup>3+</sup> phosphors.

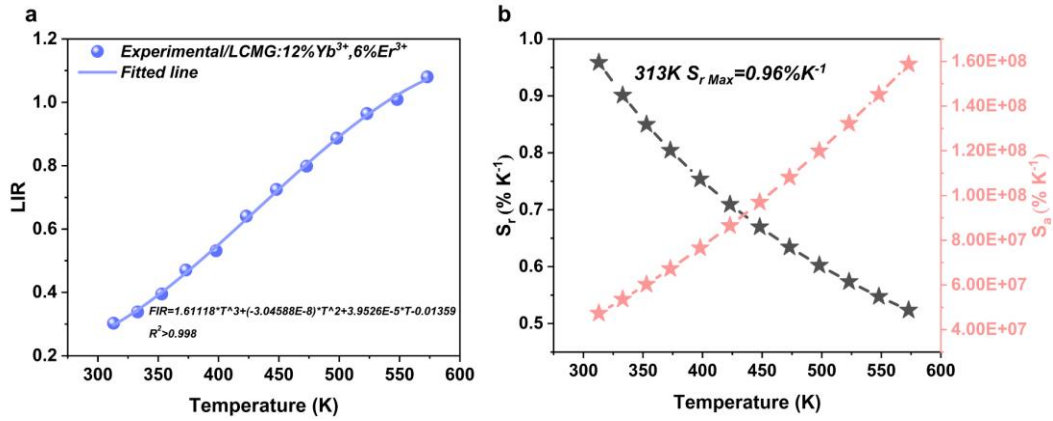

Fig. S7. (a) Temperature-dependent LIR between  $^4S_{3/2}$  and  $^4F_{9/2}$  non-TCLs. (b) The calculated relative temperature sensitivity ( $S_r$ ) and the absolutely temperature sensitivity ( $S_a$ ) of Yb-Er in the temperature ranges of 313–573 K.

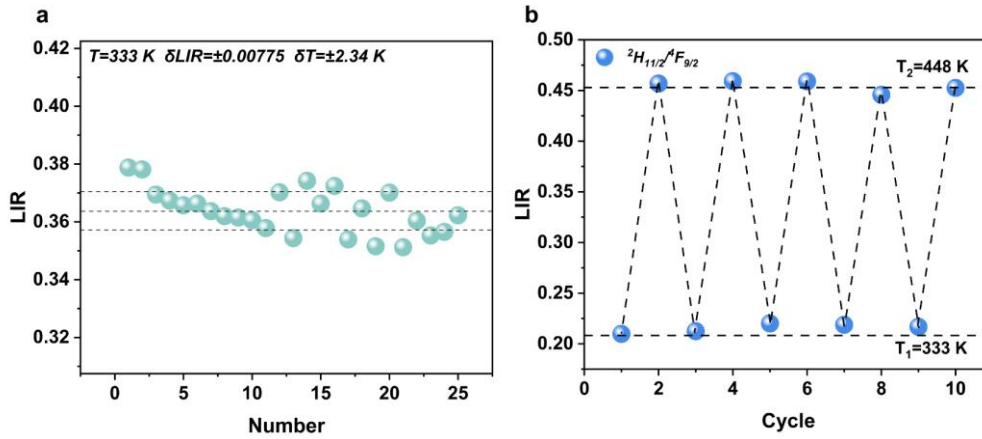

Fig. S8. (a) 25 measurements of LIR of LCMG: 12%Yb $^{3+}$ , 6%Er $^{3+}$  phosphors at 333 K. (b) The temperature-recycle measurements of LIR values of LCMG: 12%Yb $^{3+}$ , 6%Er $^{3+}$  phosphors.

Table S1. The Ionic Radii of Lu $^{3+}$ , Yb $^{3+}$ , Nd $^{3+}$ , Er $^{3+}$ , Ca $^{2+}$ , Mg $^{2+}$  and Ge $^{4+}$  at certain coordination number.

| ion        | coordination number | ionic radii (Å) |
|------------|---------------------|-----------------|
| Lu $^{3+}$ | 8                   | 0.977           |
| Yb $^{3+}$ | 8                   | 0.985           |
| Nd $^{3+}$ | 8                   | 1.109           |
| Er $^{3+}$ | 8                   | 1.004           |
| Ca $^{2+}$ | 8                   | 1.120           |
| Mg $^{2+}$ | 6                   | 0.720           |
| Ge $^{4+}$ | 4                   | 0.390           |

Table S2. Calculated Environmental Factors and Bond Parameters of LCMG Crystals.

| bond type | $E_g$   | Ks     | $C^\mu$ (eV) | $f_c^\mu$ | $\alpha_b^\mu$ ( $\text{\AA}^3$ ) | $\beta$ | $v_b^\mu$ |
|-----------|---------|--------|--------------|-----------|-----------------------------------|---------|-----------|
| Lu-O      | 19.9488 | 2.3297 | 19.4618      | 0.0482    | 0.2835                            | 0.1640  | 3.8689    |
| Ca-O      | 16.8773 | 2.1734 | 15.4803      | 0.0729    | 0.2579                            | 0.1640  | 3.9132    |
| Mg-O      | 19.7923 | 2.5450 | 18.3219      | 0.1431    | 0.1890                            | 0.1640  | 2.0238    |
| Ge-O      | 20.6571 | 3.1741 | 18.5793      | 0.1910    | 0.2709                            | 0.1640  | 1.6134    |

In Table 1,  $n_D$  represents refractivity;  $f_c$  denotes covalency;  $E_h$  and  $f_i$  denote the average homopolar energy and the average ionicity of chemical bond between the lanthanide ion and ligands;  $Z$  and  $N$  represent the average presented charge and the nearest total coordination number of ligands;  $\alpha_p$  denotes the polarizability of the immediate environment around  $\text{Er}^{3+}$  ions.

In Table S2,  $E_g$  is the average energy gap between the bonding molecular orbital and the antibonding molecular orbital of the  $\mu$ -type bond;  $f_c^\mu$  represents the covalency of any  $\mu$ -type bond;  $C^\mu$  denotes the heteropolar energy;  $\alpha_b^\mu$  denotes the polarizability of the chemical bond volume;  $v_b^\mu$  is the bond volume of any  $\mu$ -type bond.
